# Supplementary material for: Strength–ductility materials by engineering a coherent interface at incoherent precipitates
Source: Royal Society of Chemistry journal article supplement (doi:10.1039/d4mh00139g), 2024-01-01
Supplement: d4mh00139g1.pdf [file d4mh00139g1.pdf]

## Supplementary Materials for Strength-ductility materials by engineering coherent interface at incoherent precipitates

Dongxin Mao,<sup>1†</sup> Yuming Xie,<sup>1,2†</sup> Xiangchen Meng,<sup>1,2†</sup> Xiaotian Ma,<sup>2</sup> Zeyu Zhang,<sup>1</sup> Xiuwen Sun,<sup>1</sup>

Long Wan,<sup>1</sup> Korzhyk Volodymyr,<sup>3</sup> Yongxian Huang<sup>1,2\*</sup>

<sup>1</sup>State Key Laboratory of Advanced Welding and Joining, Harbin Institute of Technology, Harbin 150001, China

<sup>2</sup>Zhengzhou Research Institute, Harbin Institute of Technology, Zhengzhou 450000, China

<sup>3</sup>The E.O. Paton Electric Welding Institute of the NASU Kazymyr Malevich Str. 11, 03 150 Kyiv, Ukraine

†These authors contributed equally to this work.

\*Corresponding authors. Tel.: 86-451-86413951. E-mail: yxhuang@hit.edu.cn (Yongxian Huang).

➤ **Table S1. Chemical composition of 2195 alloy (Discussed in “5.1 Materials and preparing process”:1<sup>st</sup> paragraph)**

| 2195 powder              | Cu   | Li   | Mg   | Ag   | Zr   | Fe   | Al   |
|--------------------------|------|------|------|------|------|------|------|
| Mass percentage (wt.%)   | 3.99 | 1.09 | 0.38 | 0.42 | 0.1  | 0.17 | Bal. |
| Atomic percentage (at.%) | 1.68 | 4.19 | 0.43 | 0.10 | 0.03 | 0.08 | Bal. |

➤ **Table S2. Crystallographic information of the phases (Discussed in “2.2 Coherent-incoherent precipitates and fine grains”:7<sup>th</sup> paragraph)**

| Phase type                         | crystallographic information | plane       | interplanar spacing(nm) | Angle between planes(°) |
|------------------------------------|------------------------------|-------------|-------------------------|-------------------------|
| Al matrix                          |                              | No.1:-1-1-1 | 2.3379                  | No.1/2:109.47           |
|                                    |                              | No.2:-111   | 2.3379                  | No.2/3:54.74            |
|                                    |                              | No.3:-200   | 2.0247                  | No.1/3:54.74            |
| Al <sub>7</sub> Cu <sub>2</sub> Fe |                              | No.1:202    | 2.9145                  | No.1/2:65.37            |
|                                    |                              | No.2:21-4   | 2.2536                  | No.2/3:27.99            |
|                                    |                              | No.3:41-2   | 1.50489                 | No.1/3:37.37            |
| Al <sub>2</sub> Cu                 |                              | No.1:200    | 3.0327                  | No.1/2:45.00            |
|                                    |                              | No.2:110    | 4.2889                  | No.2/3:26.57            |
|                                    |                              | No.3:310    | 1.9180                  | No.1/3:18.43            |
| Al <sub>3</sub> Zr                 |                              | No.1:114    | 2.3701                  | No.1/2:53.76            |
|                                    |                              | No.2:200    | 2.0045                  | No.2/3:24.45            |
|                                    |                              | No.3:314    | 1.2165                  | No.1/3:29.30            |

➤ **Table S3. The disregistries  $\delta$  between different interfaces (Discussed in “3.1 Microstructural evolution”:6<sup>th</sup> paragraph)**

| Different interface                   | $[uvw]_{Al}$ | $d_{[uvw]Al}$ | $[uvw]_{Al_2Cu}$     | $d_{[uvw]Al_2Cu}$     | $\theta$ | $\delta_i$ | $\delta$ |
|---------------------------------------|--------------|---------------|----------------------|-----------------------|----------|------------|----------|
|                                       | []           | 2.225         | [200]                | 2.887                 | 19.18    | 27.21      |          |
| Al-Al <sub>2</sub> Cu                 | [00]         | 1.963         | [110]                | 4.140                 | 10.20    | 53.33      | 34.5     |
|                                       | [11]         | 2.225         | [020]                | 2.887                 | 2.86     | 23.03      |          |
| Differed interface                    | $[uvw]_{Al}$ | $d_{[uvw]Al}$ | $[uvw]_{Al_7Cu_2Fe}$ | $d_{[uvw]Al_7Cu_2Fe}$ | $\theta$ | $\delta_i$ | $\delta$ |
|                                       | []           | 2.225         | [0-16]               | 2.223                 | 0.64     | 0.08       |          |
| Al-Al <sub>7</sub> Cu <sub>2</sub> Fe | [00]         | 1.963         | [202]                | 2.946                 | 12.66    | 34.99      | 15.7     |
|                                       | [11]         | 2.225         | [21-4]               | 2.275                 | 25.61    | 11.81      |          |

- Fig. S1-S2: The distribution of  $\text{Al}_2\text{Cu}/\text{Al}_7\text{Cu}_2\text{Fe}$  in commercial 2195 alloy and DDMed 2195 alloy (Discussed in “2.2 Coherent-incoherent precipitates and fine grains”:1<sup>st</sup> paragraph)

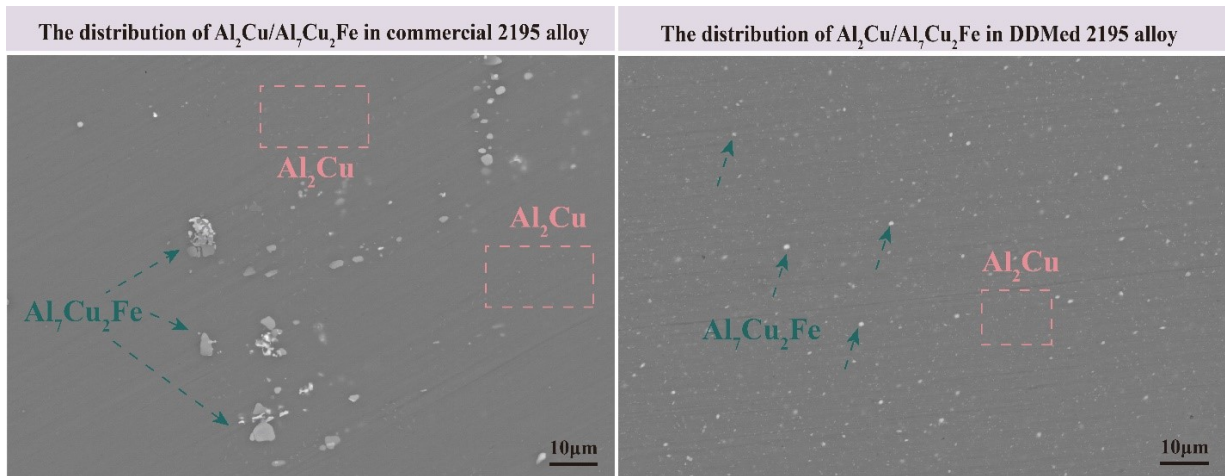

Fig. S1. The distribution of  $\text{Al}_2\text{Cu}/\text{Al}_7\text{Cu}_2\text{Fe}$  in commercial 2195 alloy and DDMed 2195 alloy via scanning electron microscope.

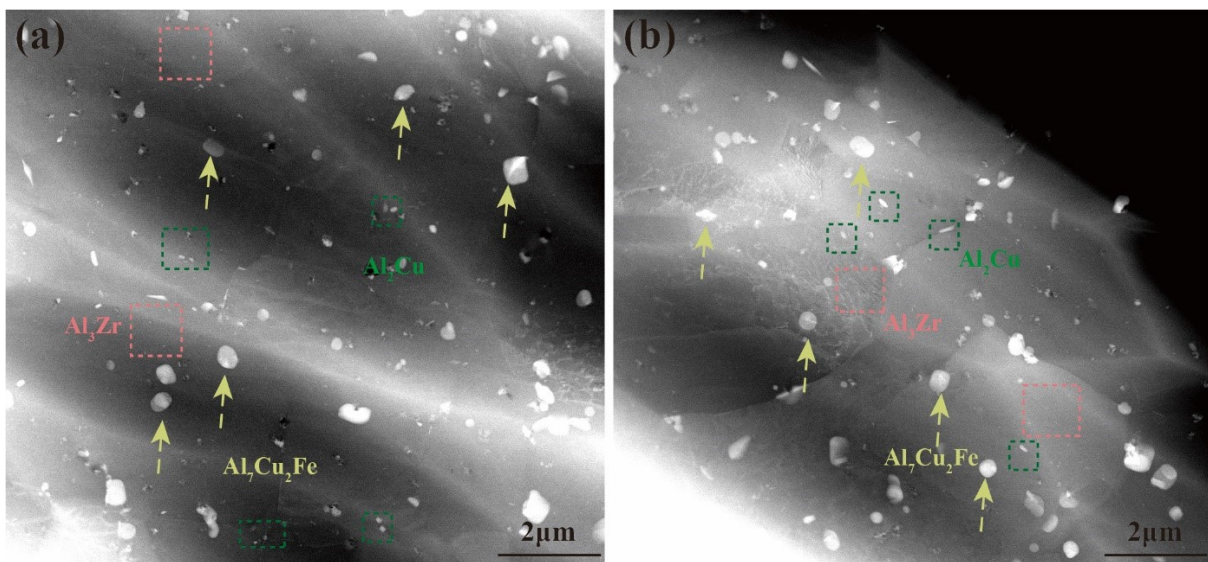

Fig. S2. The distribution of  $\text{Al}_2\text{Cu}/\text{Al}_7\text{Cu}_2\text{Fe}$  in commercial 2195 alloy and DDMed 2195 alloy via scanning transmission electron microscopy.

- Fig. S3: The grain boundary and the Taylor factor of the commercial 2195 alloy /DDMed 2195 (Discussed in “2.2 Coherent-incoherent precipitates and fine grains”:6<sup>th</sup> paragraph)

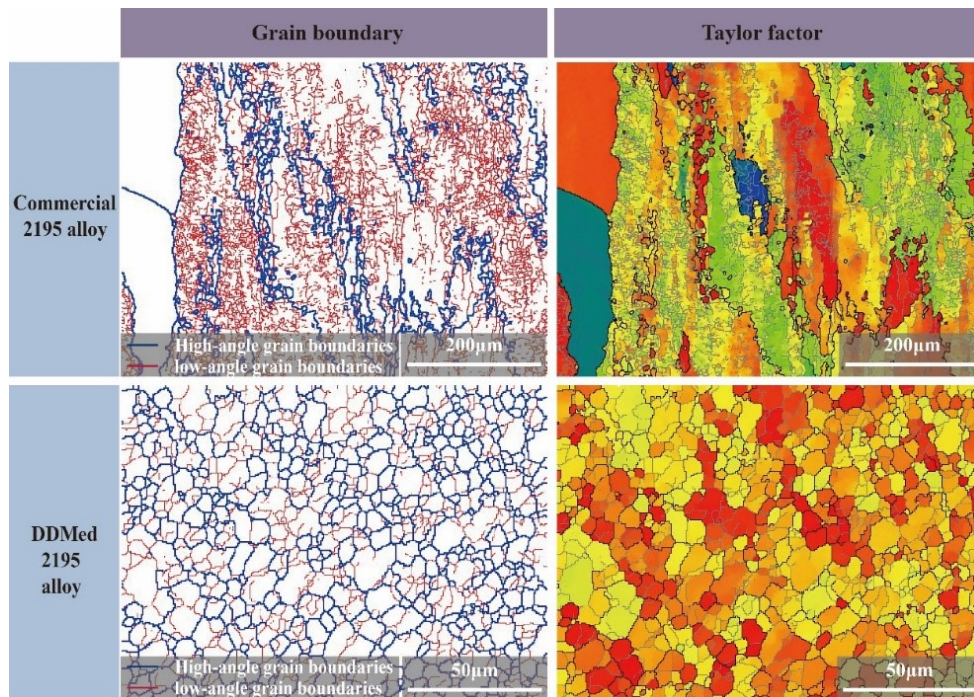

Fig. S3. The grain boundary and the Taylor factor of the commercial 2195 alloy/DDMed 2195.

➤ **Fig. S4: The point-to-point/origin misorientation profile of typical grains in the DDMed 2195 alloy (Discussed in “2.2 Coherent-incoherent precipitates and fine grains”:6<sup>th</sup> paragraph)**

The point-to-origin misorientation varies between approximately 0.0° and 1.0° and did not accumulate across the grain. Typical multi-peak distributions (Fig.S4b and S4c) within small grains were presented, which were attributed to the intragranular-distributed substructure. Such a phenomenon further clarified the typical characteristics of the DDM method with a high instantaneous plastic strain rate and its dominant continuous dynamic recrystallization mode.

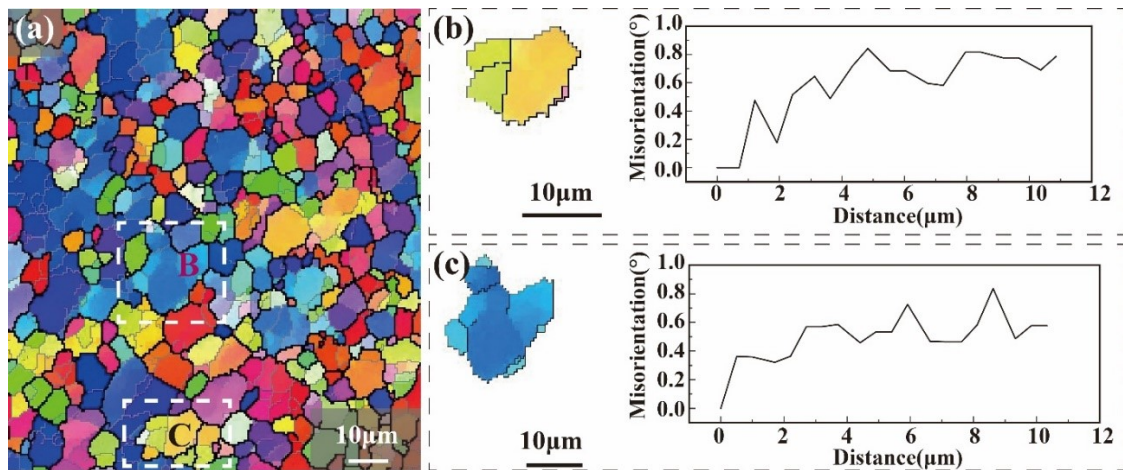

Fig. S4. The point-to-point/origin misorientation profile of typical grains in the DDMed 2195 alloy.



- **Fig. S5: Designed experiments: Let Al-Cu sheets with and without Li undergo friction stir processing at the same time to see the microstructure change. (Discussed in “3.1 Microstructural evolution”:3<sup>rd</sup> paragraph)**

The 2219 sheet (Al-Cu) and the 2195 sheet (Al-Cu-Li) were placed together tightly. The two sheets were undergone friction stir processing at the same time. The phases in the 2219 sheet were the usually-seen coarse  $\theta$  (Al-Cu) phases. In the 2195 plate, before the severe plastic deformation, the  $T_1$  (Al-Cu-Li) phases were existed, shown in XRD (Fig. S3 E). After the severe plastic deformation, usually-seen needle-like  $T_1$  (Al-Cu-Li) phases were missing instead **by the wave-like stripes with pairs of symmetrical satellite diffraction spot patterns and LPSO (Long Period Stacking Ordered) phases.**

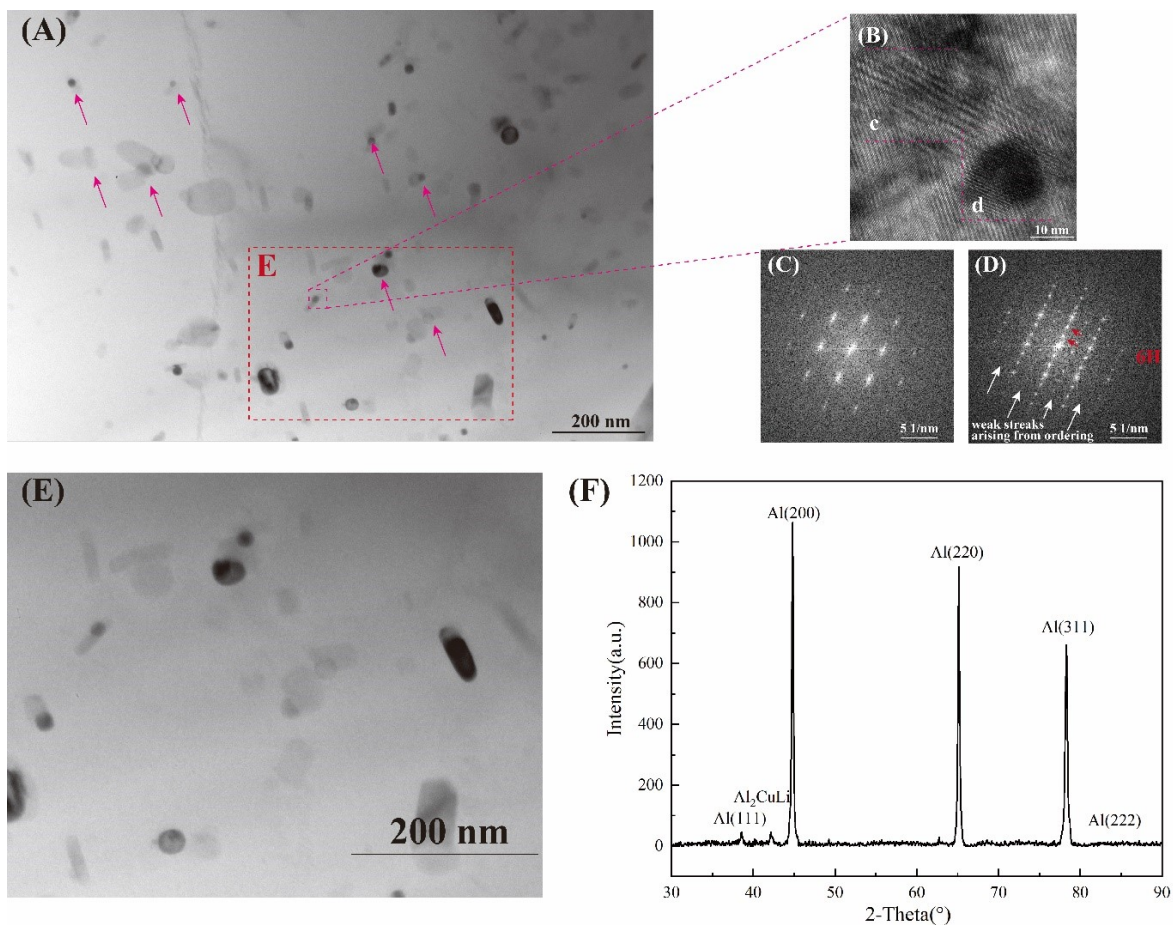

Fig. S5 TEM figure of the 2195 sheet. (A) Bright filed figure of the 2195 sheet. (B) The HR-TEM of the selected phase. (C) The selected area electron diffraction spot patterns of area c. (D) The selected area electron diffraction spot patterns of area d. (E) Magnified view of area E in Figure A (F) The XRD data of the 2195 sheet before the svere plastic deformation.

- **Fig. S6: Bright and dark field figures of the precipitates in the DDMed 2195 alloy (Discussed in “3.1 Microstructural evolution”:3<sup>rd</sup> paragraph)**

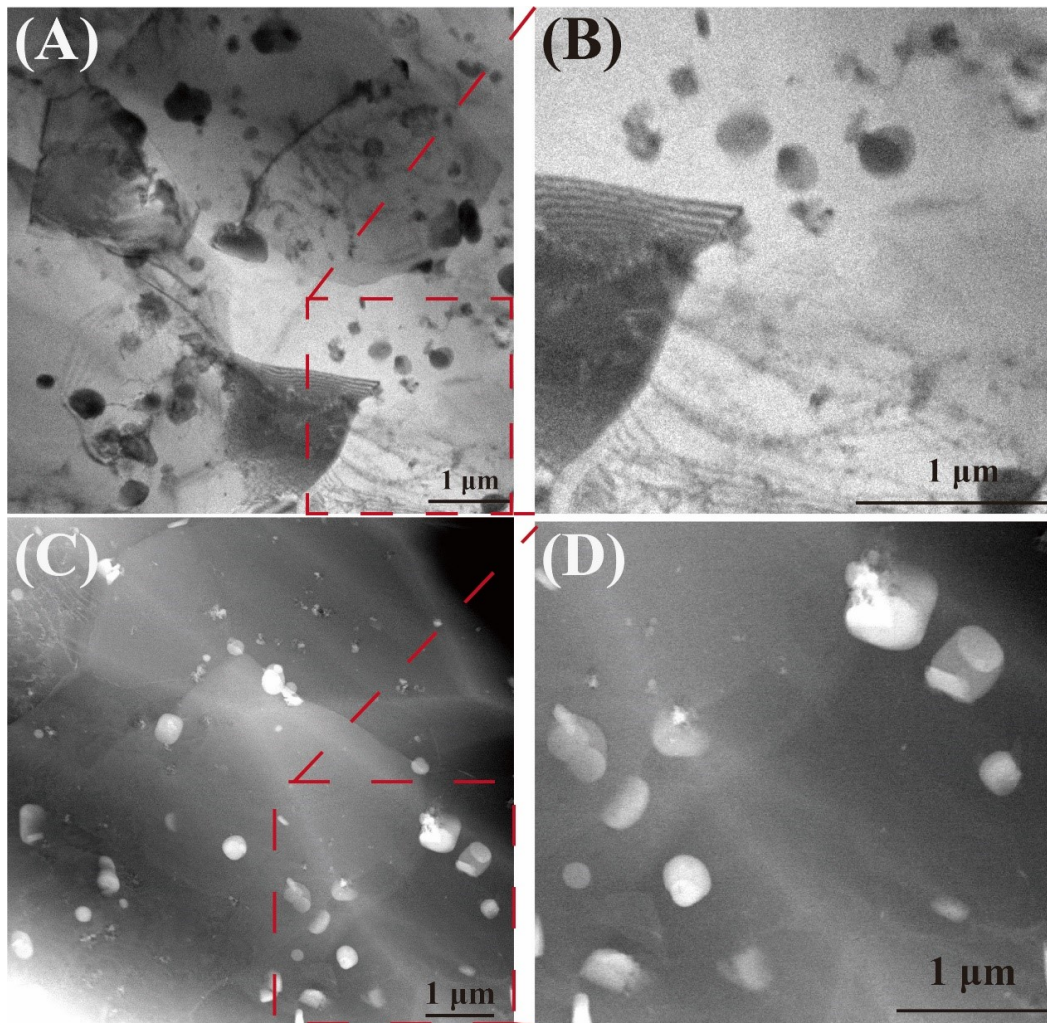

Fig. S6 Bright and dark field figures of the precipitates. (A) Bright field figure. (B) The enlarged figure of the red rectangle in Figure A. (C) Dark field figure. (D) The enlarged figure of the red rectangle in Figure C.

- **Fig. S7: Speculation of dislocation and precipitate interactions process (Discussed in “3.2**

### Strength-ductility synergy mechanism":3<sup>rd</sup> paragraph)

The speculation of dislocation and coherent-incoherent precipitates interactions process was given below:

Different from the Orowan mechanism, dislocations would not accumulate locally around the precipitate, causing stress concentration. Conversely, under the effect of the long-range elastic interactions induced by the core-incoherent structure, the dislocations were pre-bended while cutting through the coherent structure. Thus, the dislocations could glide through the precipitate with increasing strain. And then, the bent dislocations would be straightened under the effect of line tension.

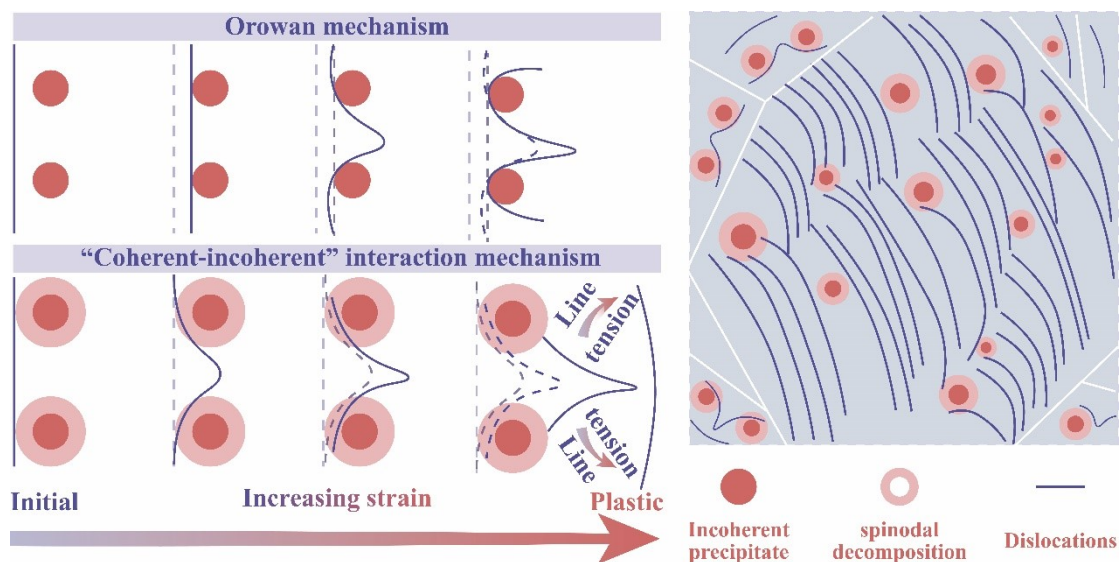

Fig. S7. Schematics of the "coherent-incoherent" strain-hardening mechanisms.



- Fig. S8: Schematic of the DDM process and the related temperature-time curve (Discussed in “5.1 Materials and preparing process”:1<sup>st</sup> paragraph)

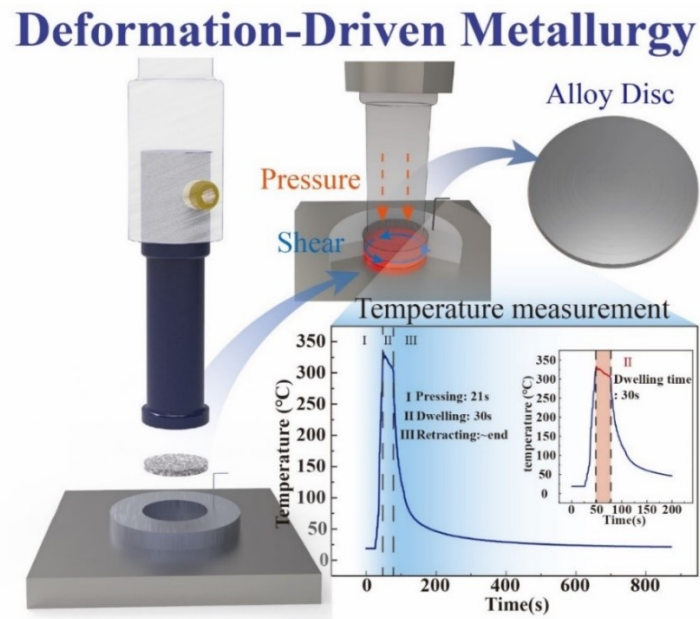

Fig. S8. Schematic of the DDM process and the temperature-time curve during the process.

- **Fig. S9: The selected diffraction spots we used for all GPA analysis (Discussed in “5.2 Characterization”:1<sup>st</sup> paragraph)**

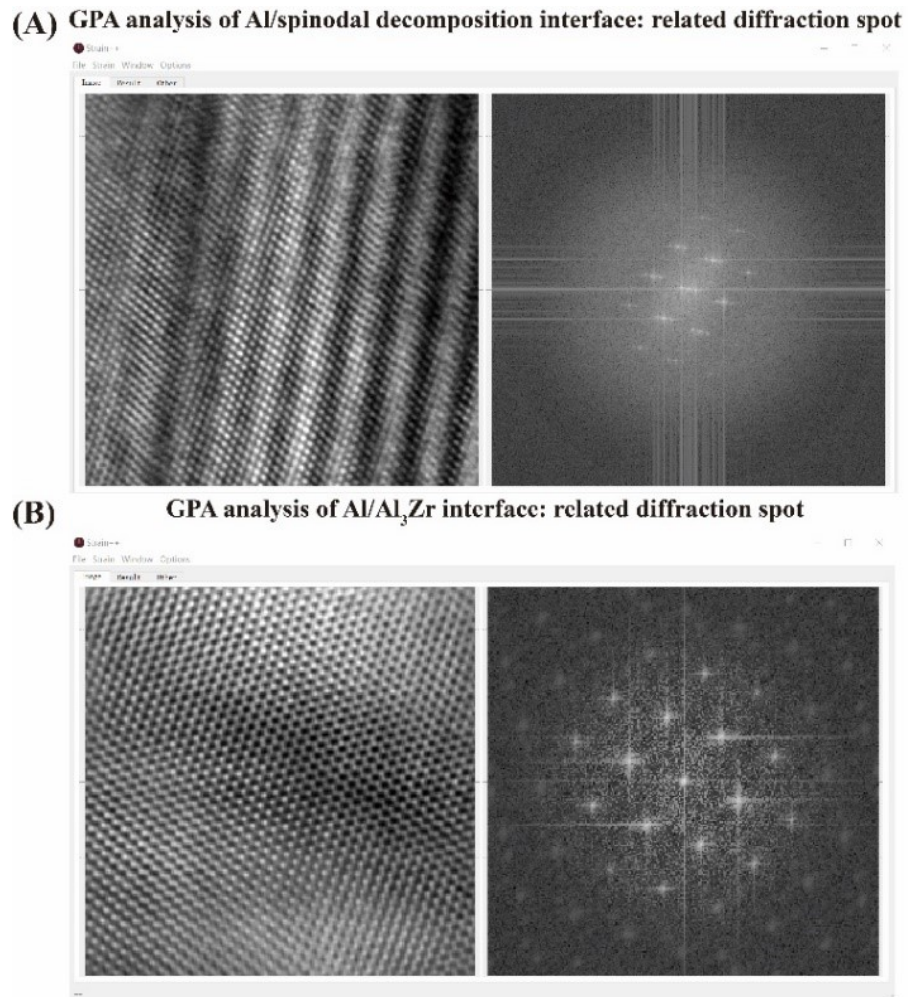

Fig. S9. The selected diffraction spots we used for all GPA analysis.

➤ **Videos**

**Video S1.**

The diffraction spots changing at the Al<sub>2</sub>Cu/Al interface.

**Video S2.**

The diffraction spots changing at the Al<sub>7</sub>Cu<sub>2</sub>Fe/Al interface.
